# Supplementary material for: Parallel I/O in FMS and MOM5
Source: Copernicus journal article supplement (doi:10.5194/gmd-2019-257), 2019-10-11
Supplement: Supplementary file [file gmd-2019-257-AC1-supplement.pdf]

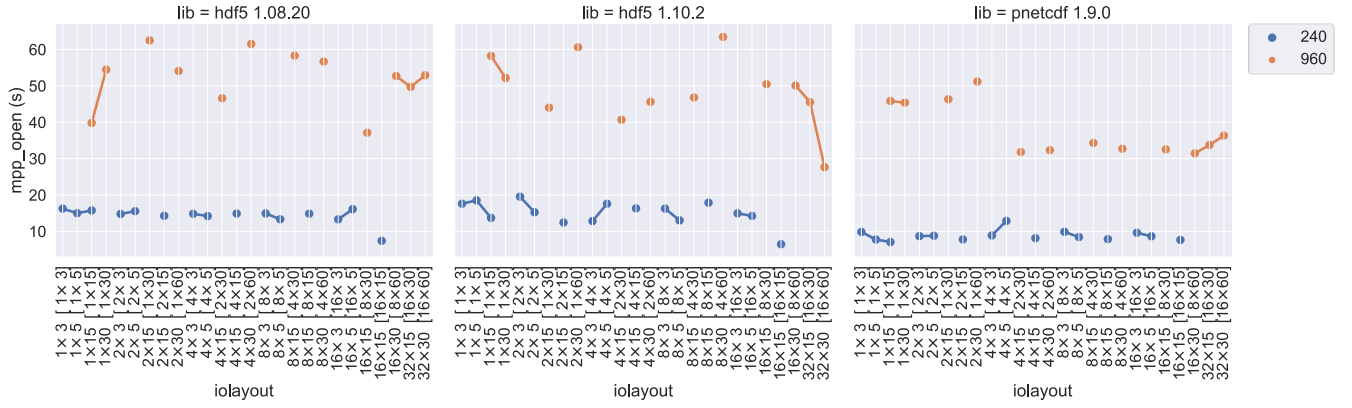

**Figure 3. mpp\_open time (in sec.) versus I/O layout in different libraries and PE numbers. HDF5 times are generally larger than in PnetCDF, and the runtime increases as PEs increase from 240 to 960. The I/O layout together with its PE distribution in [PE per node  $\times$  nodes] are labelled in X-axis.**

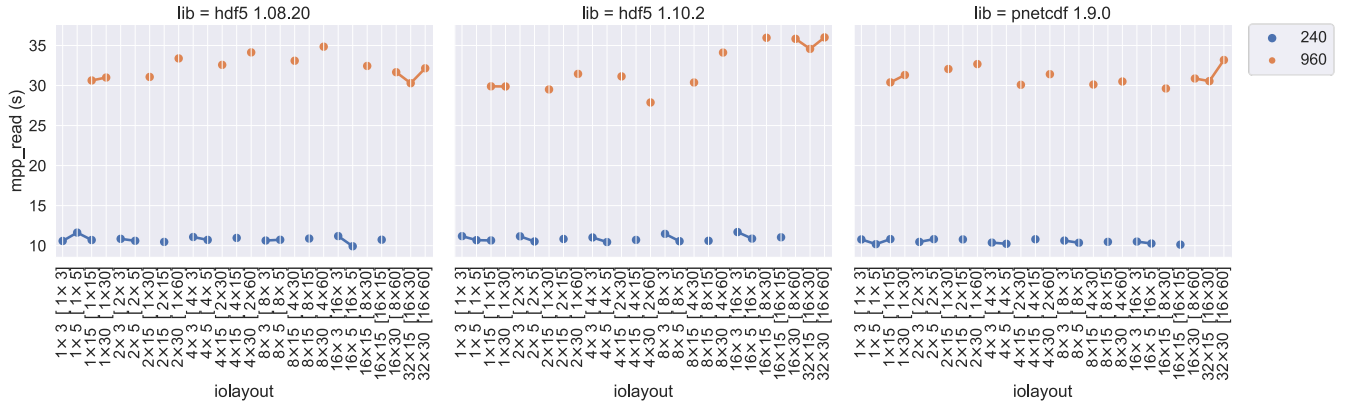

**Figure 4. mpp\_read time (in sec.) versus I/O layout in different libraries and PE numbers. Read operations do not use I/O layout or parallel I/O, and runtimes are largely independent of layout and library. Read times increase significantly as the number of PEs is increased. The I/O layout together with its PE distribution in [PE per node  $\times$  nodes] are labelled in X-axis.**

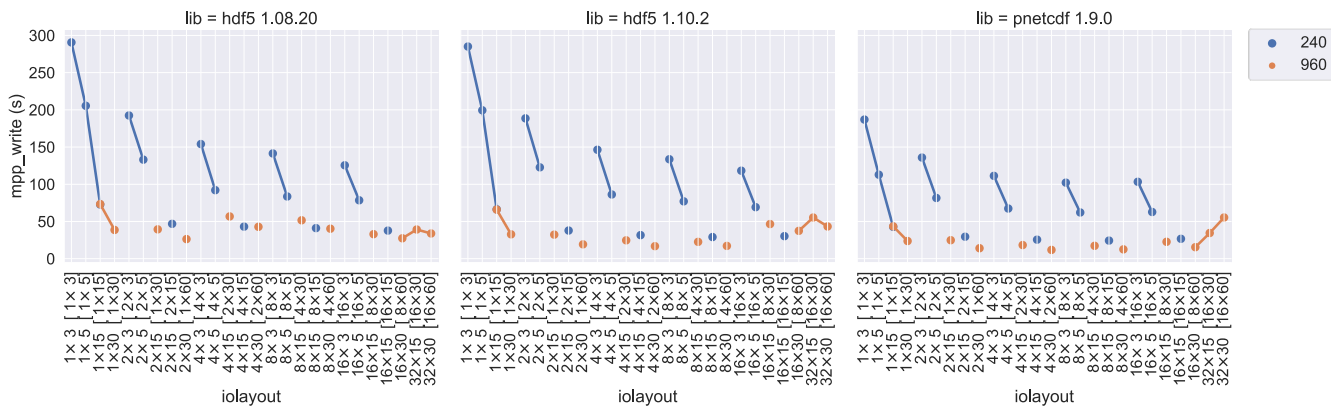

Figure 5. `mpp_write` time versus I/O layout for different library and PE numbers. Write time improves greatly as I/O nodes are increased (grouped curves), and modestly as the I/O PEs per node are increased (across grouped curves). Runtimes are scalarly reduced as PEs are increased. PnetCDF shows modest improvement over HDF5 performance. The I/O layout together with its PE distribution in [PE per node  $\times$  nodes] are labelled in X-axis.

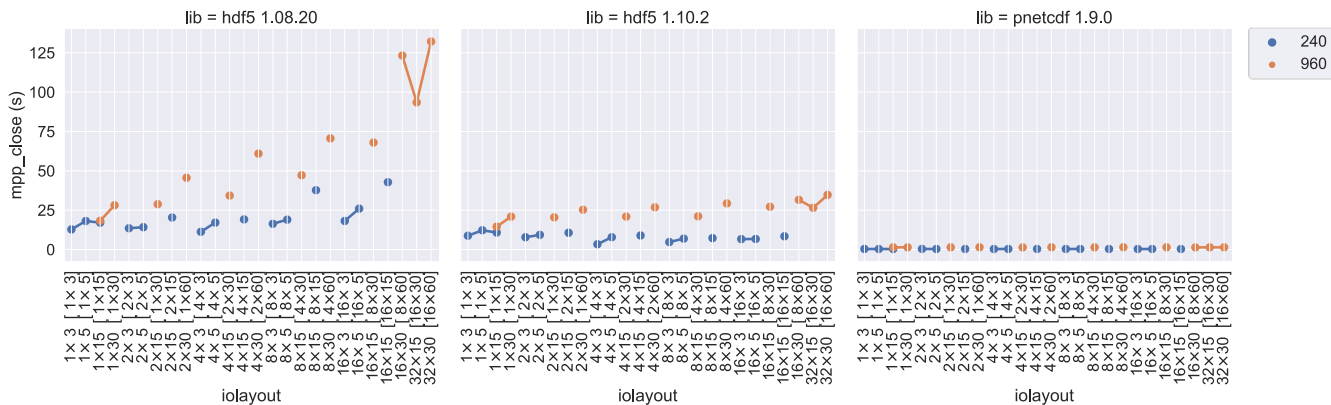

Figure 6. `mpp_close` time versus I/O layout with different libraries and PE numbers. Contentions within the HDF5 library lead to performance problems, which increase with layout and number of PEs. PnetCDF does not exhibit these issues and close times are negligible. The I/O layout together with its PE distribution in [PE per node  $\times$  nodes] are labelled in X-axis.

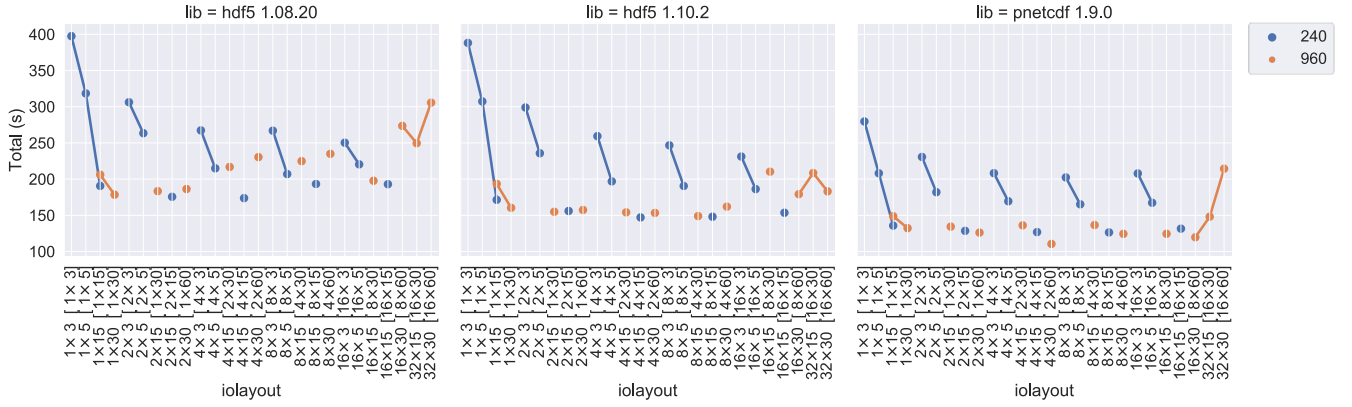

**Figure 7. Total elapsed time versus I/O layout for different libraries and PE numbers. Higher contention at 960 PEs can overwhelm the overall performance trends observed at 240 PEs. The I/O layout together with its PE distribution in [PE per node × nodes] are labelled in X-axis.**

**Table 6. The time metrics of 0.1° model in 720-PE and 1440-PE runs with less I/O frequencies, i.e. write per 1 day and 4 days in 8-day simulations. SIO represents the original single threaded write; PIO represents parallel shared write. The I/O time composes of contributions from mpp\_open, mpp\_read, mpp\_write and mpp\_close. The I/O time ratio is given between the I/O time and total runtime.**

| I/O pattern&Format |                             | SIO in netCDF4_classic |         | PIO in netCDF-4 |       | PIO in netCDF-3 |       |
|--------------------|-----------------------------|------------------------|---------|-----------------|-------|-----------------|-------|
| I/O frequency      |                             | 1-day                  | 4-day   | 1-day           | 4-day | 1-day           | 4-day |
| 720 PEs            | Total runtime (sec.)        | 8114                   | 7817    | 7685            | 7569  | 7666            | 7469  |
|                    | I/O time / mpp_write (sec.) | 494/453                | 302/265 | 75/40           | 62/27 | 57/17           | 49/11 |
|                    | I/O ratio                   | 6.09%                  | 3.87%   | 0.98%           | 0.82% | 0.74%           | 0.66% |
| 1440 PEs           | Total runtime (sec.)        | 4118                   | 3743    | 3547            | 3578  | 3518            | 3549  |
|                    | I/O time / mpp_write (sec.) | 452/421                | 269/238 | 59/24           | 48/14 | 51/14           | 40/7  |
|                    | I/O time ratio              | 10.98%                 | 7.18%   | 1.67%           | 1.35% | 1.45%           | 1.14% |
